# Supplementary material for: Lung Protection Strategies during Cardiopulmonary Bypass Affect the Composition of Blood Electrolytes and Metabolites—A Randomized Controlled Trial
Source: PubMed Central journal article supplement (PMC6262287; doi:10.3390/jcm7110462), 2018-11-21
Supplement: jcm-07-00462-s001.pdf [file jcm-07-00462-s001.pdf]

**Table S1.** Overview of metabolite changes with time in each corresponding group

| Metabolites            | Pre-CPB (mM) |       |       | End CPB (mM) |       |       | 2 Hours Post-CPB (mM) |       |       | 4 Hours Post-CPB (mM) |       |       | 6 Hours Post-CPB (mM) |       |       | 20 Hours Post-CPB (mM) |       |       | Time    | Time *                   |                          |
|------------------------|--------------|-------|-------|--------------|-------|-------|-----------------------|-------|-------|-----------------------|-------|-------|-----------------------|-------|-------|------------------------|-------|-------|---------|--------------------------|--------------------------|
|                        | Standard     | HTK   | O2    | Standard     | HTK   | O2    | Standard              | HTK   | O2    | Standard              | HTK   | O2    | Standard              | HTK   | O2    | Standard               | HTK   | O2    | p-value | p-value                  |                          |
| Trigonelline #         | Mean         | 0.004 | 0.007 | 0.007        | 0.005 | 0.009 | 0.006                 | 0.004 | 0.009 | 0.005                 | 0.004 | 0.006 | 0.006                 | 0.004 | 0.006 | 0.005                  | 0.003 | 0.003 | 0.003   | 0.002                    | 0.01                     |
|                        | SD           | 0.003 | 0.009 | 0.007        | 0.005 | 0.008 | 0.006                 | 0.004 | 0.009 | 0.005                 | 0.004 | 0.006 | 0.005                 | 0.004 | 0.006 | 0.004                  | 0.003 | 0.003 | 0.004   |                          |                          |
| Formate #              | Mean         | 0.012 | 0.011 | 0.012        | 0.012 | 0.013 | 0.012                 | 0.011 | 0.012 | 0.011                 | 0.011 | 0.012 | 0.010                 | 0.010 | 0.011 | 0.010                  | 0.010 | 0.011 | 0.010   | 2.35 × 10 <sup>6</sup>   | 0.01                     |
|                        | SD           | 0.003 | 0.001 | 0.002        | 0.003 | 0.002 | 0.002                 | 0.003 | 0.002 | 0.002                 | 0.003 | 0.002 | 0.002                 | 0.002 | 0.002 | 0.002                  | 0.002 | 0.002 | 0.002   |                          |                          |
| Phenylalanine #        | Mean         | 0.055 | 0.055 | 0.052        | 0.071 | 0.072 | 0.073                 | 0.064 | 0.074 | 0.067                 | 0.061 | 0.070 | 0.060                 | 0.056 | 0.068 | 0.060                  | 0.073 | 0.087 | 0.077   | 2.61 × 10 <sup>18</sup>  | 0.02                     |
|                        | SD           | 0.012 | 0.009 | 0.012        | 0.017 | 0.016 | 0.020                 | 0.018 | 0.016 | 0.018                 | 0.017 | 0.022 | 0.017                 | 0.015 | 0.022 | 0.016                  | 0.016 | 0.021 | 0.016   |                          |                          |
| Tyrosine               | Mean         | 0.038 | 0.037 | 0.036        | 0.043 | 0.041 | 0.043                 | 0.039 | 0.034 | 0.039                 | 0.039 | 0.035 | 0.036                 | 0.034 | 0.033 | 0.033                  | 0.038 | 0.043 | 0.043   | 1.90 × 10 <sup>6</sup>   | 0.67                     |
|                        | SD           | 0.009 | 0.010 | 0.010        | 0.012 | 0.011 | 0.012                 | 0.010 | 0.009 | 0.010                 | 0.013 | 0.010 | 0.010                 | 0.009 | 0.011 | 0.010                  | 0.011 | 0.013 | 0.010   |                          |                          |
| Glucuronate            | Mean         | 0.002 | 0.004 | 0.010        | 0.004 | 0.005 | 0.012                 | 0.037 | 0.054 | 0.052                 | 0.054 | 0.062 | 0.061                 | 0.064 | 0.069 | 0.064                  | 0.060 | 0.040 | 0.049   | 4.72 × 10 <sup>42</sup>  | 0.39                     |
|                        | SD           | 0.00  | 0.01  | 0.02         | 0.01  | 0.01  | 0.02                  | 0.02  | 0.04  | 0.03                  | 0.02  | 0.04  | 0.03                  | 0.03  | 0.04  | 0.04                   | 0.05  | 0.04  | 0.06    |                          |                          |
| Histidine #            | Mean         | 0.068 | 0.066 | 0.065        | 0.071 | 6.362 | 0.068                 | 0.069 | 3.984 | 0.067                 | 0.064 | 2.790 | 0.063                 | 0.064 | 2.040 | 0.062                  | 0.061 | 0.474 | 0.063   | 1.74 × 10 <sup>82</sup>  | 1.57 × 10 <sup>187</sup> |
|                        | SD           | 0.009 | 0.014 | 0.011        | 0.013 | 2.011 | 0.014                 | 0.012 | 1.284 | 0.014                 | 0.016 | 1.018 | 0.015                 | 0.019 | 0.729 | 0.013                  | 0.013 | 0.463 | 0.011   |                          |                          |
| Urea #                 | Mean         | 0.103 | 0.131 | 0.139        | 0.121 | 0.138 | 0.143                 | 0.119 | 0.142 | 0.140                 | 0.122 | 0.156 | 0.143                 | 0.123 | 0.166 | 0.145                  | 0.129 | 0.181 | 0.131   | 0.31                     | 0.01                     |
|                        | SD           | 0.03  | 0.08  | 0.08         | 0.05  | 0.08  | 0.09                  | 0.05  | 0.07  | 0.07                  | 0.06  | 0.07  | 0.08                  | 0.05  | 0.07  | 0.07                   | 0.05  | 0.08  | 0.04    |                          |                          |
| Triacylglycerine (TAG) | Mean         | 0.261 | 0.307 | 0.296        | 0.002 | 0.002 | 0.020                 | 0.076 | 0.076 | 0.096                 | 0.099 | 0.080 | 0.155                 | 0.091 | 0.078 | 0.164                  | 0.108 | 0.138 | 0.209   | 6.27 × 10 <sup>24</sup>  | 0.27                     |
|                        | SD           | 0.15  | 0.25  | 0.19         | 0.00  | 0.00  | 0.08                  | 0.08  | 0.10  | 0.12                  | 0.12  | 0.10  | 0.22                  | 0.11  | 0.12  | 0.27                   | 0.13  | 0.13  | 0.30    |                          |                          |
| Mannose                | Mean         | 0.046 | 0.045 | 0.043        | 0.049 | 0.044 | 0.049                 | 0.056 | 0.048 | 0.053                 | 0.060 | 0.055 | 0.057                 | 0.063 | 0.062 | 0.060                  | 0.074 | 0.079 | 0.074   | 1.45 × 10 <sup>32</sup>  | 0.72                     |
|                        | SD           | 0.01  | 0.02  | 0.01         | 0.01  | 0.01  | 0.01                  | 0.02  | 0.02  | 0.01                  | 0.02  | 0.02  | 0.01                  | 0.02  | 0.01  | 0.02                   | 0.02  | 0.02  | 0.02    |                          |                          |
| Phosphoenol-pyruvate   | Mean         | 0.011 | 0.011 | 0.010        | 0.013 | 0.015 | 0.013                 | 0.013 | 0.014 | 0.014                 | 0.014 | 0.014 | 0.014                 | 0.014 | 0.013 | 0.013                  | 0.011 | 0.012 | 0.012   | 2.32 × 10 <sup>6</sup>   | 0.93                     |
|                        | SD           | 0.004 | 0.004 | 0.004        | 0.004 | 0.004 | 0.004                 | 0.005 | 0.005 | 0.004                 | 0.006 | 0.004 | 0.005                 | 0.005 | 0.005 | 0.005                  | 0.005 | 0.005 | 0.005   |                          |                          |
| Myo-inositol           | Mean         | 0.020 | 0.023 | 0.025        | 0.022 | 0.023 | 0.026                 | 0.025 | 0.032 | 0.033                 | 0.029 | 0.042 | 0.039                 | 0.036 | 0.051 | 0.040                  | 0.065 | 0.061 | 0.074   | 2.48 × 10 <sup>17</sup>  | 0.79                     |
|                        | SD           | 0.02  | 0.03  | 0.02         | 0.02  | 0.02  | 0.02                  | 0.03  | 0.03  | 0.03                  | 0.03  | 0.04  | 0.03                  | 0.04  | 0.04  | 0.03                   | 0.05  | 0.05  | 0.04    |                          |                          |
| Mannitol #             | Mean         | 0.052 | 0.146 | 0.358        | 7.081 | 8.292 | 6.234                 | 4.924 | 5.940 | 4.967                 | 3.759 | 4.351 | 3.474                 | 3.137 | 3.464 | 2.871                  | 1.003 | 0.819 | 0.820   | 3.70 × 10 <sup>126</sup> | 0.00016                  |
|                        | SD           | 0.02  | 0.44  | 1.31         | 2.14  | 2.48  | 2.37                  | 1.33  | 1.95  | 1.58                  | 1.37  | 1.64  | 1.10                  | 1.34  | 1.38  | 1.15                   | 0.92  | 0.89  | 0.66    |                          |                          |
| Creatinine             | Mean         | 0.042 | 0.042 | 0.046        | 0.057 | 0.054 | 0.058                 | 0.055 | 0.052 | 0.058                 | 0.058 | 0.056 | 0.058                 | 0.058 | 0.059 | 0.057                  | 0.060 | 0.052 | 0.056   | 0.0007                   | 0.99                     |
|                        | SD           | 0.01  | 0.02  | 0.02         | 0.02  | 0.02  | 0.02                  | 0.02  | 0.02  | 0.03                  | 0.02  | 0.02  | 0.03                  | 0.03  | 0.02  | 0.02                   | 0.03  | 0.03  | 0.02    |                          |                          |
| Creatine #             | Mean         | 0.027 | 0.032 | 0.032        | 0.030 | 0.072 | 0.038                 | 0.035 | 0.082 | 0.042                 | 0.036 | 0.069 | 0.045                 | 0.038 | 0.055 | 0.043                  | 0.035 | 0.051 | 0.048   | 0.00003                  | 3.53 × 10 <sup>14</sup>  |
|                        | SD           | 0.01  | 0.02  | 0.02         | 0.02  | 0.03  | 0.02                  | 0.02  | 0.04  | 0.03                  | 0.02  | 0.04  | 0.03                  | 0.03  | 0.03  | 0.03                   | 0.02  | 0.03  | 0.04    |                          |                          |
| Lysine                 | Mean         | 0.133 | 0.135 | 0.132        | 0.173 | 0.190 | 0.161                 | 0.162 | 0.167 | 0.153                 | 0.141 | 0.125 | 0.126                 | 0.120 | 0.103 | 0.110                  | 0.098 | 0.101 | 0.111   | 3.82 × 10 <sup>41</sup>  | 0.07                     |
|                        | SD           | 0.05  | 0.04  | 0.04         | 0.03  | 0.04  | 0.04                  | 0.03  | 0.04  | 0.04                  | 0.03  | 0.04  | 0.03                  | 0.02  | 0.04  | 0.03                   | 0.03  | 0.03  | 0.03    |                          |                          |
| Citrate                | Mean         | 0.041 | 0.043 | 0.045        | 0.071 | 0.064 | 0.073                 | 0.067 | 0.063 | 0.071                 | 0.062 | 0.063 | 0.064                 | 0.061 | 0.057 | 0.061                  | 0.049 | 0.051 | 0.053   | 2.22 × 10 <sup>12</sup>  | 0.97                     |
|                        | SD           | 0.01  | 0.01  | 0.01         | 0.02  | 0.01  | 0.02                  | 0.04  | 0.03  | 0.03                  | 0.02  | 0.04  | 0.03                  | 0.02  | 0.03  | 0.02                   | 0.02  | 0.01  | 0.03    |                          |                          |
| Acetoacetic acid       | Mean         | 0.048 | 0.040 | 0.049        | 0.064 | 0.037 | 0.061                 | 0.053 | 0.066 | 0.065                 | 0.070 | 0.074 | 0.066                 | 0.065 | 0.040 | 0.063                  | 0.106 | 0.086 | 0.074   | 0.0001                   | 0.48                     |
|                        | SD           | 0.05  | 0.02  | 0.03         | 0.08  | 0.04  | 0.04                  | 0.04  | 0.05  | 0.05                  | 0.06  | 0.06  | 0.07                  | 0.05  | 0.04  | 0.08                   | 0.08  | 0.07  | 0.07    |                          |                          |
| Acetone                | Mean         | 0.013 | 0.011 | 0.013        | 0.022 | 0.017 | 0.020                 | 0.029 | 0.024 | 0.026                 | 0.033 | 0.029 | 0.029                 | 0.032 | 0.028 | 0.030                  | 0.025 | 0.027 | 0.022   | 9.14 × 10 <sup>10</sup>  | 0.98                     |

|                                     |      |       |       |       |       |       |       |       |       |       |       |       |       |       |       |       |       |       |       |                       |                       |
|-------------------------------------|------|-------|-------|-------|-------|-------|-------|-------|-------|-------|-------|-------|-------|-------|-------|-------|-------|-------|-------|-----------------------|-----------------------|
|                                     | SD   | 0.02  | 0.01  | 0.01  | 0.02  | 0.01  | 0.01  | 0.03  | 0.01  | 0.01  | 0.03  | 0.02  | 0.02  | 0.02  | 0.02  | 0.02  | 0.02  | 0.02  | 0.02  |                       |                       |
| NAC-Glycoprotein                    | Mean | 0.062 | 0.067 | 0.060 | 0.048 | 0.048 | 0.047 | 0.057 | 0.055 | 0.053 | 0.058 | 0.057 | 0.055 | 0.058 | 0.058 | 0.055 | 0.066 | 0.066 | 0.060 | $2.68 \times 10^{18}$ | 0.36                  |
|                                     | SD   | 0.012 | 0.014 | 0.008 | 0.010 | 0.013 | 0.007 | 0.013 | 0.014 | 0.008 | 0.012 | 0.014 | 0.009 | 0.012 | 0.015 | 0.010 | 0.012 | 0.014 | 0.012 |                       |                       |
| Alanine #                           | Mean | 0.224 | 0.230 | 0.222 | 0.339 | 0.618 | 0.334 | 0.285 | 0.565 | 0.306 | 0.273 | 0.493 | 0.302 | 0.264 | 0.462 | 0.306 | 0.213 | 0.288 | 0.256 | $4.73 \times 10^{39}$ | $4.66 \times 10^{51}$ |
|                                     | SD   | 0.06  | 0.07  | 0.07  | 0.08  | 0.13  | 0.10  | 0.08  | 0.14  | 0.10  | 0.10  | 0.14  | 0.10  | 0.10  | 0.14  | 0.11  | 0.06  | 0.11  | 0.11  |                       |                       |
| 3-Hydroxybutyric acid (3-HBA)       | Mean | 0.071 | 0.090 | 0.074 | 0.180 | 0.101 | 0.181 | 0.122 | 0.146 | 0.179 | 0.157 | 0.130 | 0.142 | 0.138 | 0.088 | 0.156 | 0.172 | 0.166 | 0.155 | 0.008                 | 0.63                  |
|                                     | SD   | 0.08  | 0.08  | 0.06  | 0.24  | 0.16  | 0.14  | 0.14  | 0.17  | 0.16  | 0.14  | 0.11  | 0.17  | 0.13  | 0.11  | 0.22  | 0.16  | 0.14  | 0.16  |                       |                       |
| Isobutyric acid                     | Mean | 0.159 | 0.141 | 0.201 | 0.161 | 0.150 | 0.228 | 0.125 | 0.142 | 0.190 | 0.091 | 0.107 | 0.141 | 0.072 | 0.086 | 0.122 | 0.018 | 0.013 | 0.022 | $1.41 \times 10^{16}$ | 0.14                  |
|                                     | SD   | 0.15  | 0.11  | 0.15  | 0.15  | 0.13  | 0.20  | 0.11  | 0.13  | 0.21  | 0.08  | 0.09  | 0.15  | 0.06  | 0.08  | 0.14  | 0.04  | 0.02  | 0.02  |                       |                       |
| Monounsaturated fatty acid (MUFA) # | Mean | 1.21  | 1.28  | 1.31  | 0.55  | 0.57  | 0.67  | 0.89  | 0.92  | 1.01  | 1.00  | 0.99  | 1.18  | 0.99  | 1.01  | 1.23  | 0.90  | 1.07  | 1.21  | $1.41 \times 10^{23}$ | 0.04                  |
|                                     | SD   | 0.34  | 0.39  | 0.45  | 0.12  | 0.15  | 0.30  | 0.22  | 0.32  | 0.28  | 0.26  | 0.26  | 0.54  | 0.25  | 0.27  | 0.72  | 0.29  | 0.33  | 0.77  |                       |                       |
| Glycine #                           | Mean | 0.186 | 0.177 | 0.182 | 0.223 | 0.261 | 0.202 | 0.173 | 0.273 | 0.166 | 0.135 | 0.232 | 0.137 | 0.129 | 0.216 | 0.130 | 0.128 | 0.157 | 0.125 | $1.89 \times 10^{32}$ | $5.92 \times 10^{32}$ |
|                                     | SD   | 0.05  | 0.03  | 0.05  | 0.05  | 0.05  | 0.06  | 0.04  | 0.05  | 0.05  | 0.04  | 0.05  | 0.05  | 0.05  | 0.05  | 0.05  | 0.04  | 0.05  | 0.04  |                       |                       |
| Glutamine #                         | Mean | 0.485 | 0.452 | 0.451 | 0.492 | 0.743 | 0.452 | 0.436 | 0.672 | 0.412 | 0.382 | 0.551 | 0.362 | 0.357 | 0.482 | 0.364 | 0.425 | 0.479 | 0.418 | $5.03 \times 10^{28}$ | $3.28 \times 10^{52}$ |
|                                     | SD   | 0.05  | 0.06  | 0.06  | 0.08  | 0.12  | 0.08  | 0.07  | 0.13  | 0.08  | 0.08  | 0.11  | 0.08  | 0.08  | 0.09  | 0.08  | 0.10  | 0.11  | 0.11  |                       |                       |
| Glutamate #                         | Mean | 0.115 | 0.120 | 0.118 | 0.130 | 0.168 | 0.129 | 0.111 | 0.153 | 0.109 | 0.092 | 0.123 | 0.089 | 0.082 | 0.104 | 0.085 | 0.084 | 0.096 | 0.085 | $2.61 \times 10^{51}$ | $3.83 \times 10^{22}$ |
|                                     | SD   | 0.03  | 0.03  | 0.03  | 0.02  | 0.03  | 0.03  | 0.02  | 0.03  | 0.02  | 0.02  | 0.03  | 0.02  | 0.02  | 0.02  | 0.02  | 0.02  | 0.02  | 0.02  |                       |                       |
| Arginine & Proline                  | Mean | 0.035 | 0.031 | 0.031 | 0.046 | 0.051 | 0.044 | 0.042 | 0.044 | 0.040 | 0.038 | 0.035 | 0.036 | 0.033 | 0.030 | 0.034 | 0.029 | 0.031 | 0.034 | $1.10 \times 10^{23}$ | 0.25                  |
|                                     | SD   | 0.011 | 0.010 | 0.012 | 0.011 | 0.012 | 0.013 | 0.010 | 0.013 | 0.011 | 0.010 | 0.010 | 0.011 | 0.009 | 0.010 | 0.011 | 0.011 | 0.009 | 0.008 |                       |                       |
| Isoleucine #                        | Mean | 0.030 | 0.030 | 0.032 | 0.041 | 0.034 | 0.041 | 0.037 | 0.026 | 0.037 | 0.034 | 0.021 | 0.029 | 0.027 | 0.017 | 0.025 | 0.030 | 0.031 | 0.031 | $2.53 \times 10^{12}$ | 0.00006               |
|                                     | SD   | 0.008 | 0.007 | 0.010 | 0.013 | 0.012 | 0.015 | 0.013 | 0.013 | 0.017 | 0.014 | 0.011 | 0.016 | 0.011 | 0.010 | 0.015 | 0.011 | 0.008 | 0.011 |                       |                       |
| Valine                              | Mean | 0.152 | 0.157 | 0.166 | 0.171 | 0.171 | 0.182 | 0.178 | 0.174 | 0.187 | 0.184 | 0.175 | 0.178 | 0.160 | 0.166 | 0.169 | 0.135 | 0.153 | 0.151 | $2.13 \times 10^7$    | 0.73                  |
|                                     | SD   | 0.03  | 0.03  | 0.04  | 0.04  | 0.04  | 0.05  | 0.04  | 0.04  | 0.05  | 0.04  | 0.04  | 0.05  | 0.04  | 0.04  | 0.05  | 0.04  | 0.03  | 0.04  |                       |                       |
| Leucine                             | Mean | 0.087 | 0.089 | 0.092 | 0.110 | 0.103 | 0.119 | 0.110 | 0.104 | 0.113 | 0.105 | 0.094 | 0.095 | 0.085 | 0.083 | 0.086 | 0.088 | 0.095 | 0.095 | $7.39 \times 10^7$    | 0.88                  |
|                                     | SD   | 0.02  | 0.02  | 0.03  | 0.03  | 0.03  | 0.04  | 0.03  | 0.03  | 0.04  | 0.04  | 0.03  | 0.04  | 0.03  | 0.04  | 0.05  | 0.02  | 0.03  | 0.03  |                       |                       |
| Lipoproteins #                      | Mean | 1.45  | 1.54  | 1.54  | 0.75  | 0.77  | 0.89  | 1.14  | 1.09  | 1.25  | 1.22  | 1.20  | 1.36  | 1.23  | 1.20  | 1.37  | 1.16  | 1.36  | 1.40  | $5.44 \times 10^{39}$ | 0.009                 |
|                                     | SD   | 0.33  | 0.29  | 0.41  | 0.14  | 0.14  | 0.28  | 0.25  | 0.24  | 0.32  | 0.23  | 0.20  | 0.40  | 0.24  | 0.25  | 0.46  | 0.25  | 0.28  | 0.47  |                       |                       |
| Acetate                             | Mean | 0.110 | 0.102 | 0.095 | 0.111 | 0.097 | 0.103 | 0.086 | 0.083 | 0.081 | 0.079 | 0.067 | 0.070 | 0.065 | 0.052 | 0.061 | 0.041 | 0.037 | 0.039 | $2.66 \times 10^{65}$ | 0.11                  |
|                                     | SD   | 0.045 | 0.029 | 0.036 | 0.033 | 0.018 | 0.027 | 0.011 | 0.021 | 0.017 | 0.016 | 0.021 | 0.017 | 0.016 | 0.017 | 0.018 | 0.018 | 0.013 | 0.019 |                       |                       |
| Arginine & Citrulline               | Mean | 0.100 | 0.082 | 0.095 | 0.156 | 0.166 | 0.152 | 0.146 | 0.144 | 0.135 | 0.127 | 0.104 | 0.111 | 0.095 | 0.078 | 0.101 | 0.085 | 0.081 | 0.097 | $1.69 \times 10^{30}$ | 0.34                  |
|                                     | SD   | 0.04  | 0.04  | 0.05  | 0.04  | 0.04  | 0.06  | 0.04  | 0.05  | 0.05  | 0.04  | 0.04  | 0.04  | 0.04  | 0.04  | 0.04  | 0.04  | 0.04  | 0.04  |                       |                       |
| Methionine                          | Mean | 0.011 | 0.008 | 0.011 | 0.015 | 0.013 | 0.014 | 0.011 | 0.012 | 0.012 | 0.008 | 0.010 | 0.009 | 0.006 | 0.009 | 0.009 | 0.010 | 0.011 | 0.012 | $2.75 \times 10^6$    | 0.75                  |
|                                     | SD   | 0.008 | 0.005 | 0.007 | 0.009 | 0.009 | 0.008 | 0.008 | 0.008 | 0.007 | 0.006 | 0.008 | 0.007 | 0.005 | 0.007 | 0.007 | 0.008 | 0.008 | 0.008 |                       |                       |
| Threonine #                         | Mean | 0.093 | 0.089 | 0.086 | 0.097 | 0.123 | 0.088 | 0.082 | 0.120 | 0.077 | 0.074 | 0.109 | 0.069 | 0.066 | 0.102 | 0.067 | 0.069 | 0.092 | 0.069 | $4.21 \times 10^{14}$ | $1.01 \times 10^{28}$ |
|                                     | SD   | 0.02  | 0.02  | 0.03  | 0.02  | 0.03  | 0.02  | 0.02  | 0.03  | 0.02  | 0.02  | 0.02  | 0.02  | 0.02  | 0.03  | 0.02  | 0.02  | 0.03  | 0.02  |                       |                       |
| Aspartate #                         | Mean | 0.099 | 0.088 | 0.093 | 0.091 | 0.121 | 0.085 | 0.081 | 0.116 | 0.074 | 0.074 | 0.105 | 0.072 | 0.065 | 0.094 | 0.061 | 0.069 | 0.090 | 0.070 | $9.53 \times 10^8$    | $4.28 \times 10^{13}$ |
|                                     | SD   | 0.006 | 0.006 | 0.006 | 0.006 | 0.006 | 0.006 | 0.006 | 0.006 | 0.006 | 0.006 | 0.006 | 0.006 | 0.006 | 0.006 | 0.006 | 0.006 | 0.006 | 0.006 |                       |                       |
| Fucose                              | Mean | 0.011 | 0.011 | 0.012 | 0.014 | 0.015 | 0.016 | 0.015 | 0.018 | 0.018 | 0.018 | 0.018 | 0.019 | 0.017 | 0.018 | 0.019 | 0.015 | 0.015 | 0.016 | $3.58 \times 10^{16}$ | 0.89                  |
|                                     | SD   | 0.004 | 0.006 | 0.005 | 0.006 | 0.006 | 0.006 | 0.005 | 0.008 | 0.005 | 0.005 | 0.008 | 0.005 | 0.005 | 0.006 | 0.005 | 0.005 | 0.005 | 0.005 |                       |                       |
| Free Fatty acid (FFA) #             | Mean | 0.679 | 0.661 | 0.733 | 0.036 | 0.022 | 0.074 | 0.208 | 0.208 | 0.289 | 0.279 | 0.288 | 0.407 | 0.273 | 0.287 | 0.442 | 0.292 | 0.459 | 0.597 | $7.89 \times 10^{31}$ | 0.05                  |
|                                     | SD   | 0.38  | 0.35  | 0.48  | 0.12  | 0.06  | 0.18  | 0.15  | 0.15  | 0.24  | 0.20  | 0.18  | 0.42  | 0.20  | 0.23  | 0.54  | 0.21  | 0.25  | 0.67  |                       |                       |

|                   |      |       |       |       |       |       |       |       |       |       |       |       |       |       |       |       |       |       |       |                       |        |
|-------------------|------|-------|-------|-------|-------|-------|-------|-------|-------|-------|-------|-------|-------|-------|-------|-------|-------|-------|-------|-----------------------|--------|
| Pyruvate #        | Mean | 0.021 | 0.024 | 0.023 | 0.049 | 0.070 | 0.055 | 0.036 | 0.047 | 0.046 | 0.043 | 0.055 | 0.059 | 0.050 | 0.064 | 0.063 | 0.032 | 0.042 | 0.051 | $5.08 \times 10^{23}$ | 0.0004 |
|                   | SD   | 0.01  | 0.01  | 0.01  | 0.02  | 0.02  | 0.02  | 0.02  | 0.02  | 0.03  | 0.03  | 0.03  | 0.03  | 0.03  | 0.03  | 0.03  | 0.03  | 0.01  | 0.02  |                       |        |
| Glucose           | Mean | 6.11  | 6.46  | 6.34  | 7.36  | 7.65  | 7.91  | 7.69  | 8.65  | 8.30  | 8.75  | 9.40  | 9.15  | 9.06  | 9.28  | 8.85  | 7.72  | 8.01  | 7.90  | $3.60 \times 10^{23}$ | 0.75   |
|                   | SD   | 0.98  | 1.44  | 1.31  | 1.82  | 1.53  | 1.58  | 1.57  | 2.69  | 1.60  | 2.07  | 2.55  | 1.74  | 1.58  | 2.31  | 1.59  | 1.97  | 1.40  | 1.42  |                       |        |
| Lactate           | Mean | 0.69  | 0.72  | 0.78  | 1.66  | 1.94  | 1.89  | 1.24  | 1.50  | 1.49  | 1.57  | 1.87  | 1.87  | 1.61  | 2.22  | 2.21  | 1.37  | 1.31  | 1.97  | $5.28 \times 10^{10}$ | 0.43   |
|                   | SD   | 0.23  | 0.22  | 0.31  | 0.52  | 0.62  | 0.65  | 0.64  | 0.84  | 0.54  | 1.05  | 1.62  | 0.91  | 0.99  | 1.76  | 1.64  | 1.17  | 0.58  | 3.19  |                       |        |
| 2-Ketoglutarate # | Mean | 0.048 | 0.047 | 0.046 | 0.045 | 0.044 | 0.042 | 0.041 | 0.043 | 0.040 | 0.041 | 0.043 | 0.040 | 0.038 | 0.041 | 0.039 | 0.038 | 0.039 | 0.036 | 0.0002                | 0.05   |
|                   | SD   | 0.003 | 0.003 | 0.003 | 0.002 | 0.003 | 0.003 | 0.003 | 0.003 | 0.003 | 0.003 | 0.002 | 0.003 | 0.003 | 0.003 | 0.003 | 0.003 | 0.003 | 0.003 |                       |        |

Two-way ANOVA and its corresponding Tukey's post-hoc test for group comparison were used to detect differences between patients as a consequence of surgery (time) and treatment received (time-group interaction). A two-tailed  $p$ -value  $\leq 0.05$  was considered significant. Metabolites marked (#) were found to be significant for both time, and the time-treatment interaction.
